# Supplementary material for: A comparative binding mechanism between human serum albumin and α-1-acid glycoprotein with corilagin: biophysical and computational approach
Source: Royal Society of Chemistry journal article supplement (doi:10.1039/c6ra06837e), 2016-01-01
Supplement: c6ra06837e1.pdf [file c6ra06837e1.pdf]

**Supplementary Information**

**A comparative binding mechanism between human serum albumin and  $\alpha$ -1-acid glycoprotein with corilagin: Biophysical and computational approach**

Daniel Pushparaju Yeggoni<sup>†</sup>, Aparna Rachamallu<sup>‡</sup>, Rajagopal Subramanyam<sup>\*†</sup>

<sup>†</sup>Department of Plant Sciences, School of Life Sciences, University of Hyderabad, Hyderabad  
500046, India

<sup>‡</sup>National Institute of Animal Biotechnology, Axis Clinicals Building, Miyapur, Hyderabad,  
500049, India

\*Corresponding author  
Rajagopal Subramanyam  
Tel: +91-40-23134572  
Fax: +91-40-23010120  
Email: srgsl@uohyd.ernet.in

Figure S1.

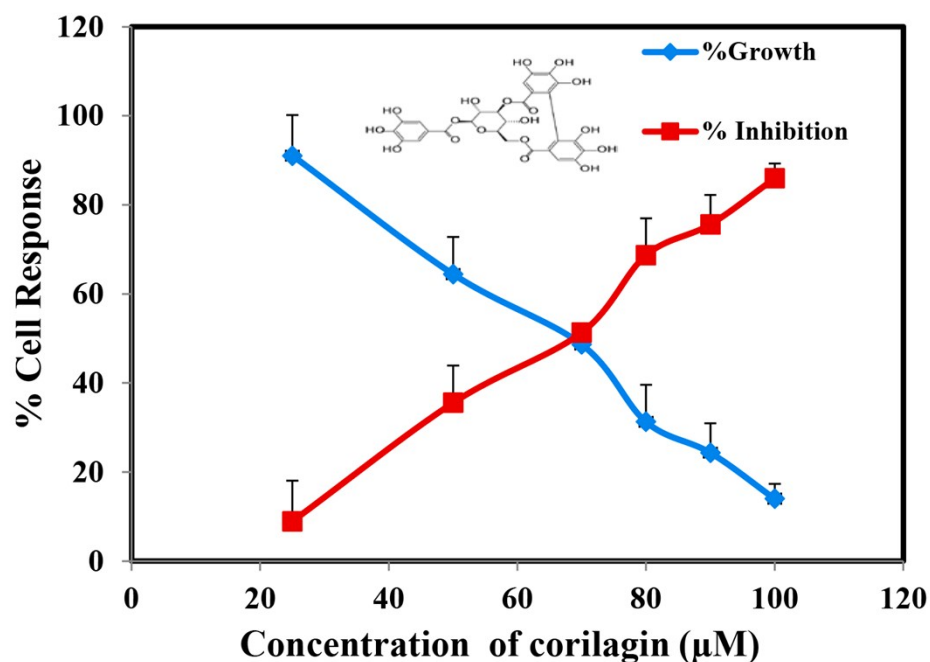

Figure S1.

Corilagin is showing anti-inflammatory properties against LPS induced mouse macrophages (RAW 264.7) in a dose-dependent manner. Cell growth was measured by the MTT assay. Insert shows the structure of Corilagin and the molecular formula (C<sub>27</sub>H<sub>22</sub>O<sub>18</sub>) and mass, 634.45 Da, respectively.

Figure S2.

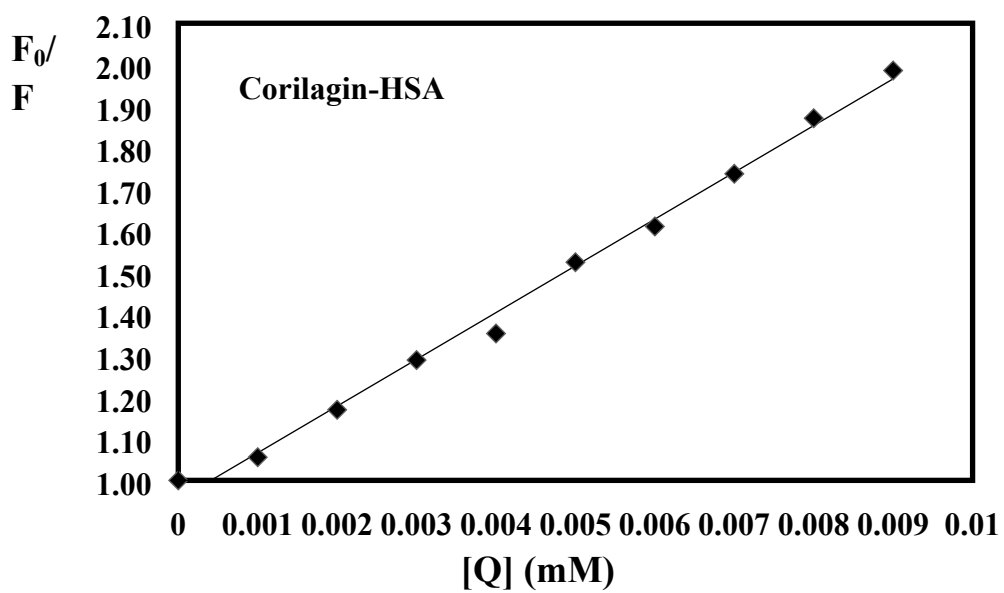

Figure S2.

Stern-Volmer plots of HSA- Corilagin complexes showing fluorescence quenching constant ( $K_q$ ) and plot of  $F_0/F$  against  $[Q]$  for Corilagin.

Figure S3.

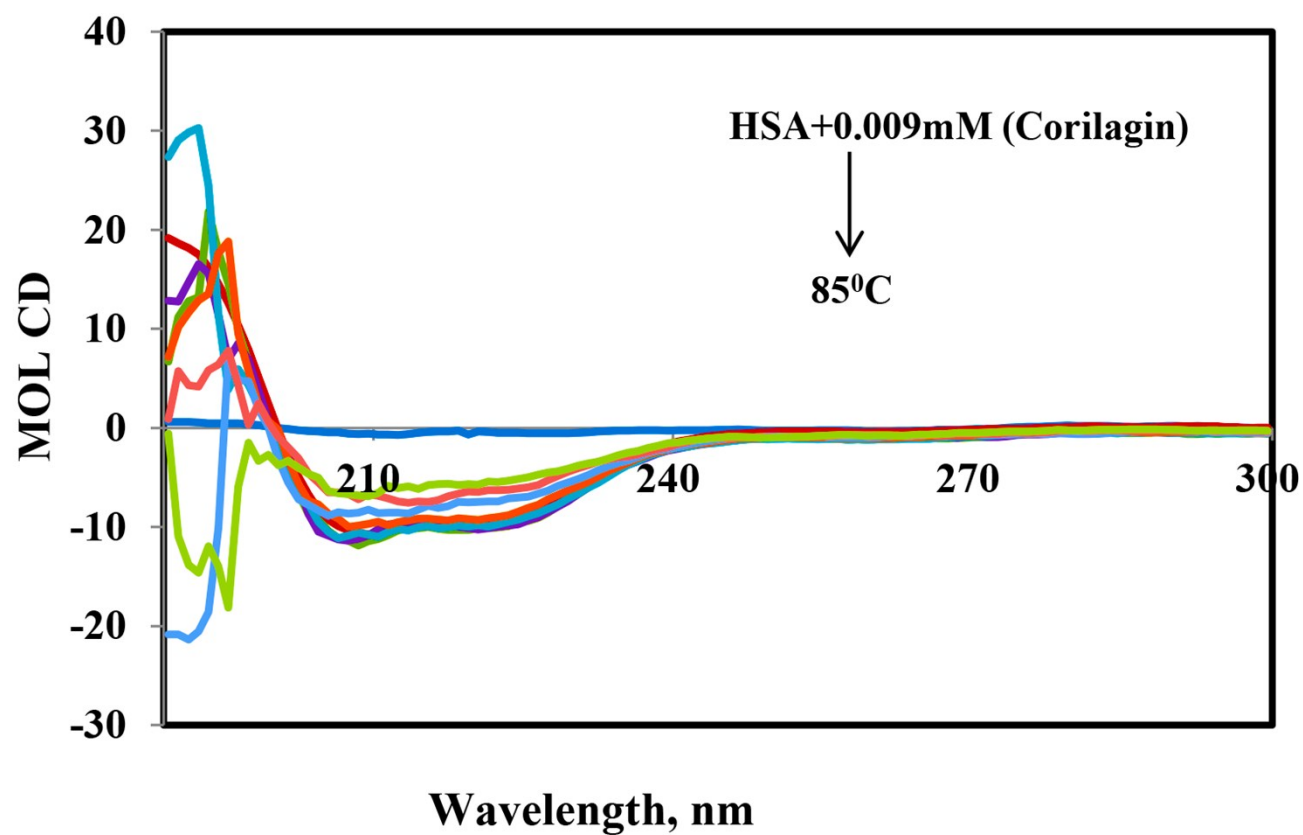

Figure S3.

Temperature-dependent CD-Spectra of HSA+corilagin complexes. HSA-corilagin complexes with temperature dependent. The temperature dependence for HSA-corilagin complexes from 25°C to 85°C with an interval of 10°C.

**Figure S4.**

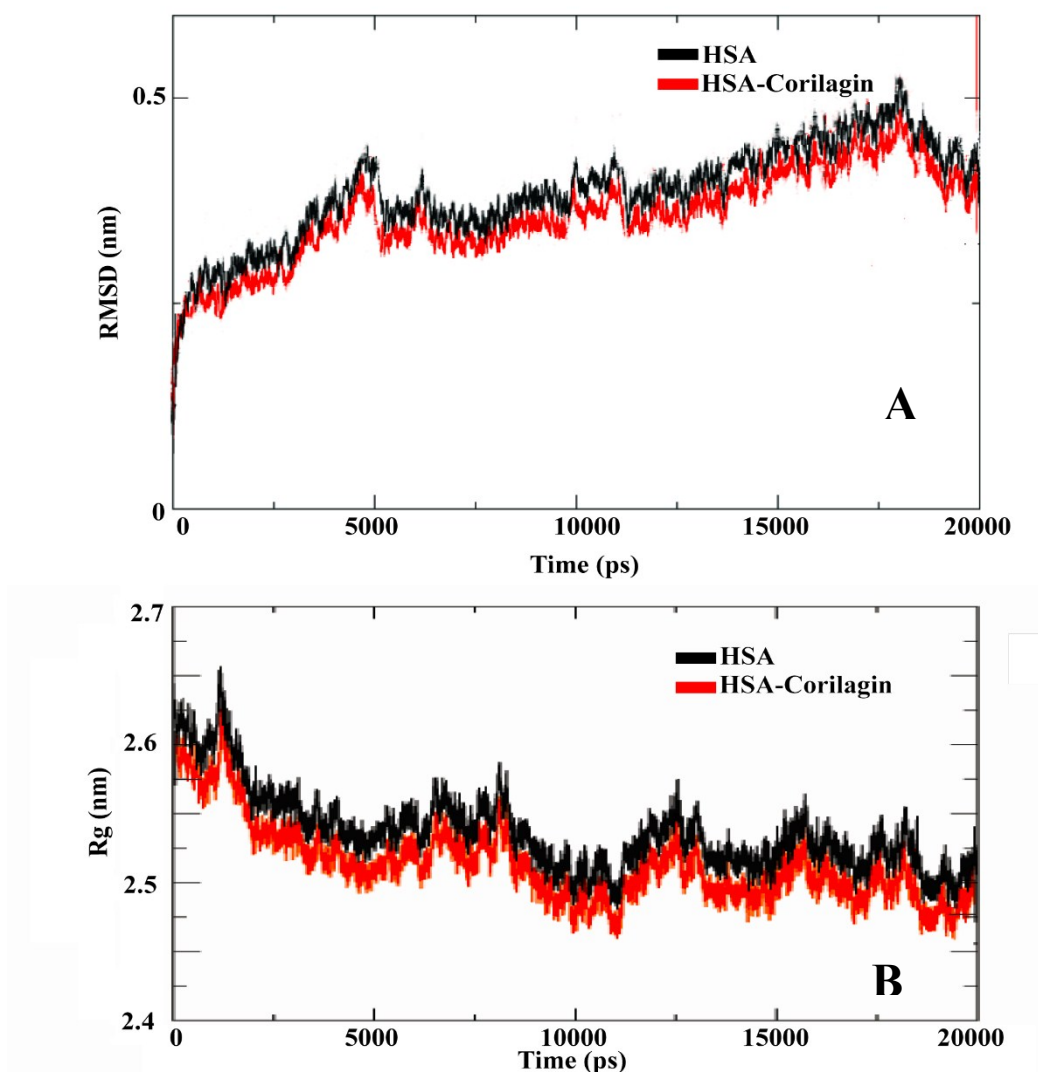

**Figure S4.**

(A) The Root mean square deviation (nm) of unligand HSA and ligand HSA (HSA- corilagin) for 20ns . (B) The Time dependence of the radius of gyration (Rg) for the backbone atoms of unligand HSA and ligand HSA (HSA- corilagin) for 20ns.
